# Supplementary material for: Performance of a point-of-care ultrasound platform for artificial intelligence-enabled assessment of pulmonary B-lines
Source: Springer Nature journal article supplement (doi:10.1186/s12947-025-00338-2), 2025-03-02

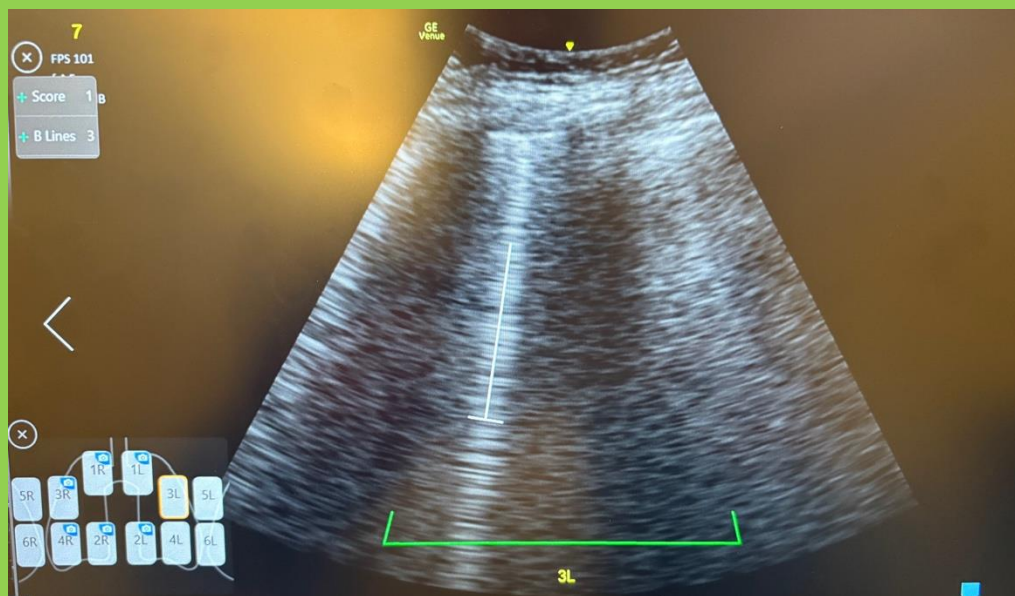

AI-generated B-line counts

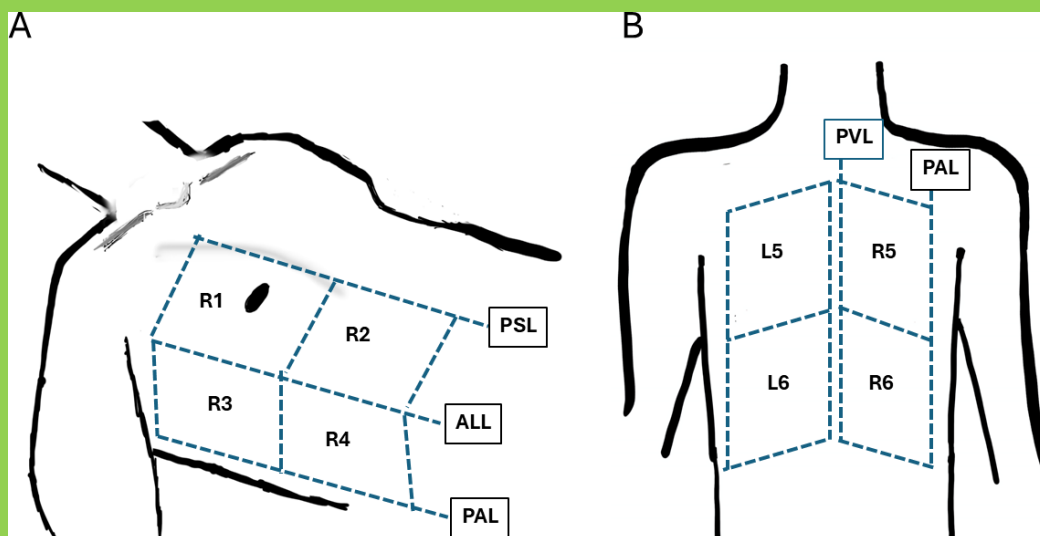

12 zone lung ultrasound protocol

## Performance of POCUS platform for AI enabled assessment of pulmonary B-lines

- ❖ Single center study with 55 patients using a 12 zone lung ultrasound protocol
- ❖ An automatic B-line tool in a major vendor was utilized
- ❖ AI B-line counts were compared to two expert reviewers using intraclass correlation coefficient (ICC)

ICC between AI and experts

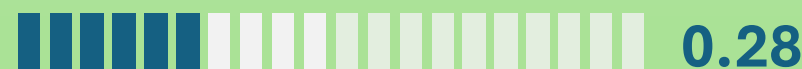

ICC between experts

0.92

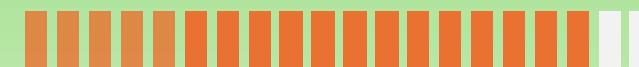

Supplement: MOESM1 [file 12947_2025_338_MOESM1_ESM.pdf]
